# Supplementary material
Source: PubMed Central journal article supplement (PMC3697971)
Supplement: 80b95c35c2401f80d7af7d765b25129b_genetics.113.152397-3.pdf [file 80b95c35c2401f80d7af7d765b25129b_genetics.113.152397-3.pdf]

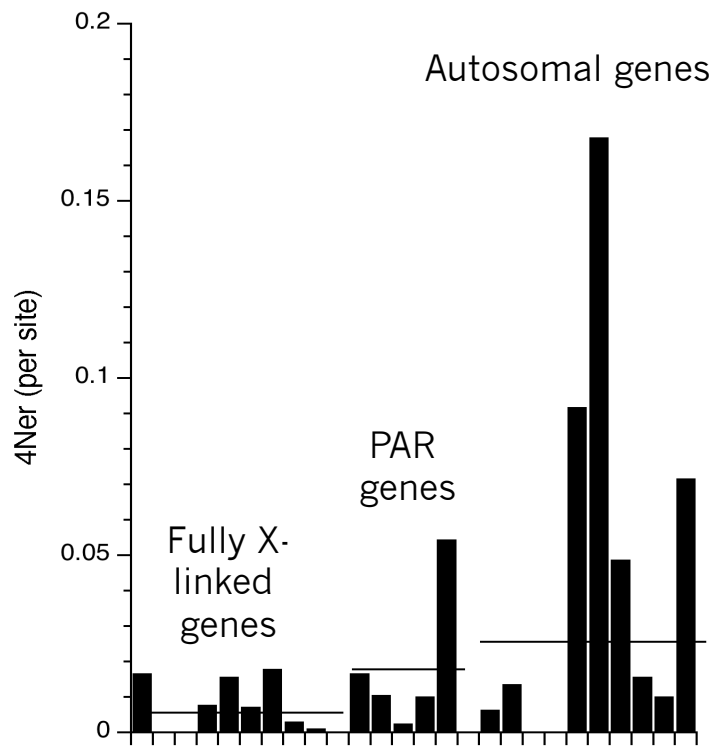

**Figure S2** Sex averaged recombination rates for autosomal, fully X-linked and PAR genes, estimated from the sequences, using LDhat software.
