# Supplementary material
Source: PubMed Central journal article supplement (PMC3697971)
Supplement: 25818ac39498088ff4055203165ba63b_genetics.113.152397-6.pdf [file 25818ac39498088ff4055203165ba63b_genetics.113.152397-6.pdf]

**Table S2** Primers used for the molecular diversity analyses of PAR genes and the newly discovered fully sex-linked E559 gene in this study.

| Genes | Primers (forward)                    | Primers (reverse)                    |
|-------|--------------------------------------|--------------------------------------|
| E200  | E200-f8: AAGAGAATCGACATGACTTTCAGGC   | E200-ri3: GGGTTTATACGTCATTACGATTCACC |
| E219  | E219-f3: TCGACGGTGTTCATCAATCTGTGC    | E219-r3: CCCTATTCTGAAAACCTTGCCAGC    |
| E241  | E241-f3: AAGAGTGGAAAGTAAAGCGGAAG     | E241-r2: GCGACTATTATCTTGGCATTITTTGTC |
| E284  | E284-f2: GTTGTGCTTTATTGGTTTTTGGTCC   | E284-r3: ACTCAAAAATCATAGCAGCACAAAGG  |
| E559  | E559-f2: ACATGGAGAATACTTCGAAGTGACCC  | E559-r: ACTTGTTTCCTCAAGGATGACACC     |
| E592  | E592-f2: GAGATCATAACAAGCATCAGACGGAGC | E592-r2: AATCATTCTCTGGCTTTCAGCAAAGC  |
