# Supplementary material
Source: PubMed Central journal article supplement (PMC3697971)
Supplement: f703a7b66717c27306ba61b3468db5a4_genetics.113.152397-5.pdf [file f703a7b66717c27306ba61b3468db5a4_genetics.113.152397-5.pdf]

**Table S3** Summary of LD analyses, excluding all sites with > 2 variants (and also excluding one female plant F13 plant in Table S1 whose sequences are incomplete). The phases of variants were inferred using HaploRec, using a minimum allele frequency for variants of 10%. The loci are ordered according to our estimated recombination distances from the PAR boundary.

| Gene                      | Number of sequences analyzed | Sequence numbers excluded from analysis | Number of variants | Zns <sup>1</sup> | Number of significant Fisher's exact tests/Number of comparisons (after Bonferroni correction) | Rmin <sup>2</sup> |
|---------------------------|------------------------------|-----------------------------------------|--------------------|------------------|------------------------------------------------------------------------------------------------|-------------------|
| <i>E559</i>               | 40                           | F2, 12 (or also excluding M3, M18)      | 7                  | 0.277            | 6/21 = 0.29                                                                                    | 3                 |
| <i>E200</i>               | 38                           | M3, F2, 6                               | 8                  | 0.314            | 5/28 = 0.18                                                                                    | 2                 |
| <i>E241</i>               | 38                           | M3, F1, F2                              | 50                 | 0.193            | 158/1225 = 0.13                                                                                | 9                 |
| <i>E284<sub>PAR</sub></i> | 31                           | M3, 8, 23, F1, 4, 8a, 10                | 102                | 0.167            | 181/5151 = 0.04                                                                                | 19                |
| <i>E592</i>               | 31                           | M11, 23, F2, 3b, 6, 9, 12               | 276                | 0.414            | 135/351 = 0.38                                                                                 | 5                 |
| <i>E219</i>               | 38                           | F6, 8, 9                                | 43                 | 0.565            | 461/903 = 0.51                                                                                 | 7                 |
| First 4 genes             | 25                           | M3, 8, 23, F1, 2, 4, 6, 8a, 10, 12      | 263                | 0.139            | 57/3240 = 0.018                                                                                | 19                |
| All genes                 | 20                           | As row above, plus M11, F3b, 9          | 224                | 0.139            | — (too many variants to test)                                                                  | 38                |

<sup>1</sup> The linkage disequilibrium measure of JK Kelly (1997 A test of neutrality based on interlocus associations. *Genetics* 146, 1197-1206).

<sup>2</sup> The minimum number of recombination events (Hudson RR, Kaplan NL, 1985 Statistical properties of the number of recombination events in the history of a sample of DNA sequences. *Genetics* 111, 147-164).
