# Supplementary material
Source: PubMed Central journal article supplement (PMC3697971)

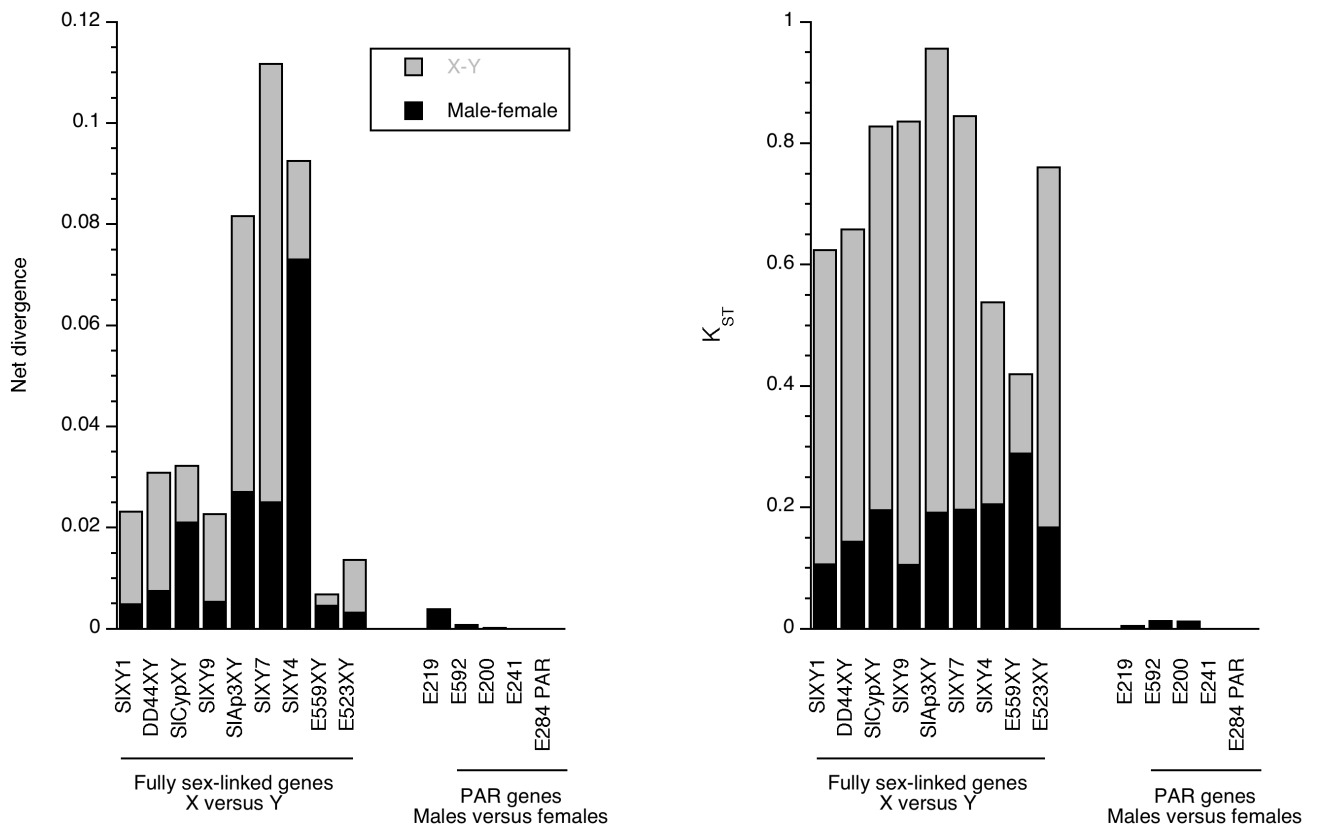

**Figure S1** Net divergence between sequences from males and females, and  $K_{ST}$ .

Supplement: 414bf09392449bb8277ba19ac38dbac0_genetics.113.152397-4.pdf [file 414bf09392449bb8277ba19ac38dbac0_genetics.113.152397-4.pdf]
